# Supplementary material
Source: publisher site journal article supplement (https://www.dovepress.com/article/344393)
Supplement: Supplementary file 1 [file get_supplementary_file.php]

**
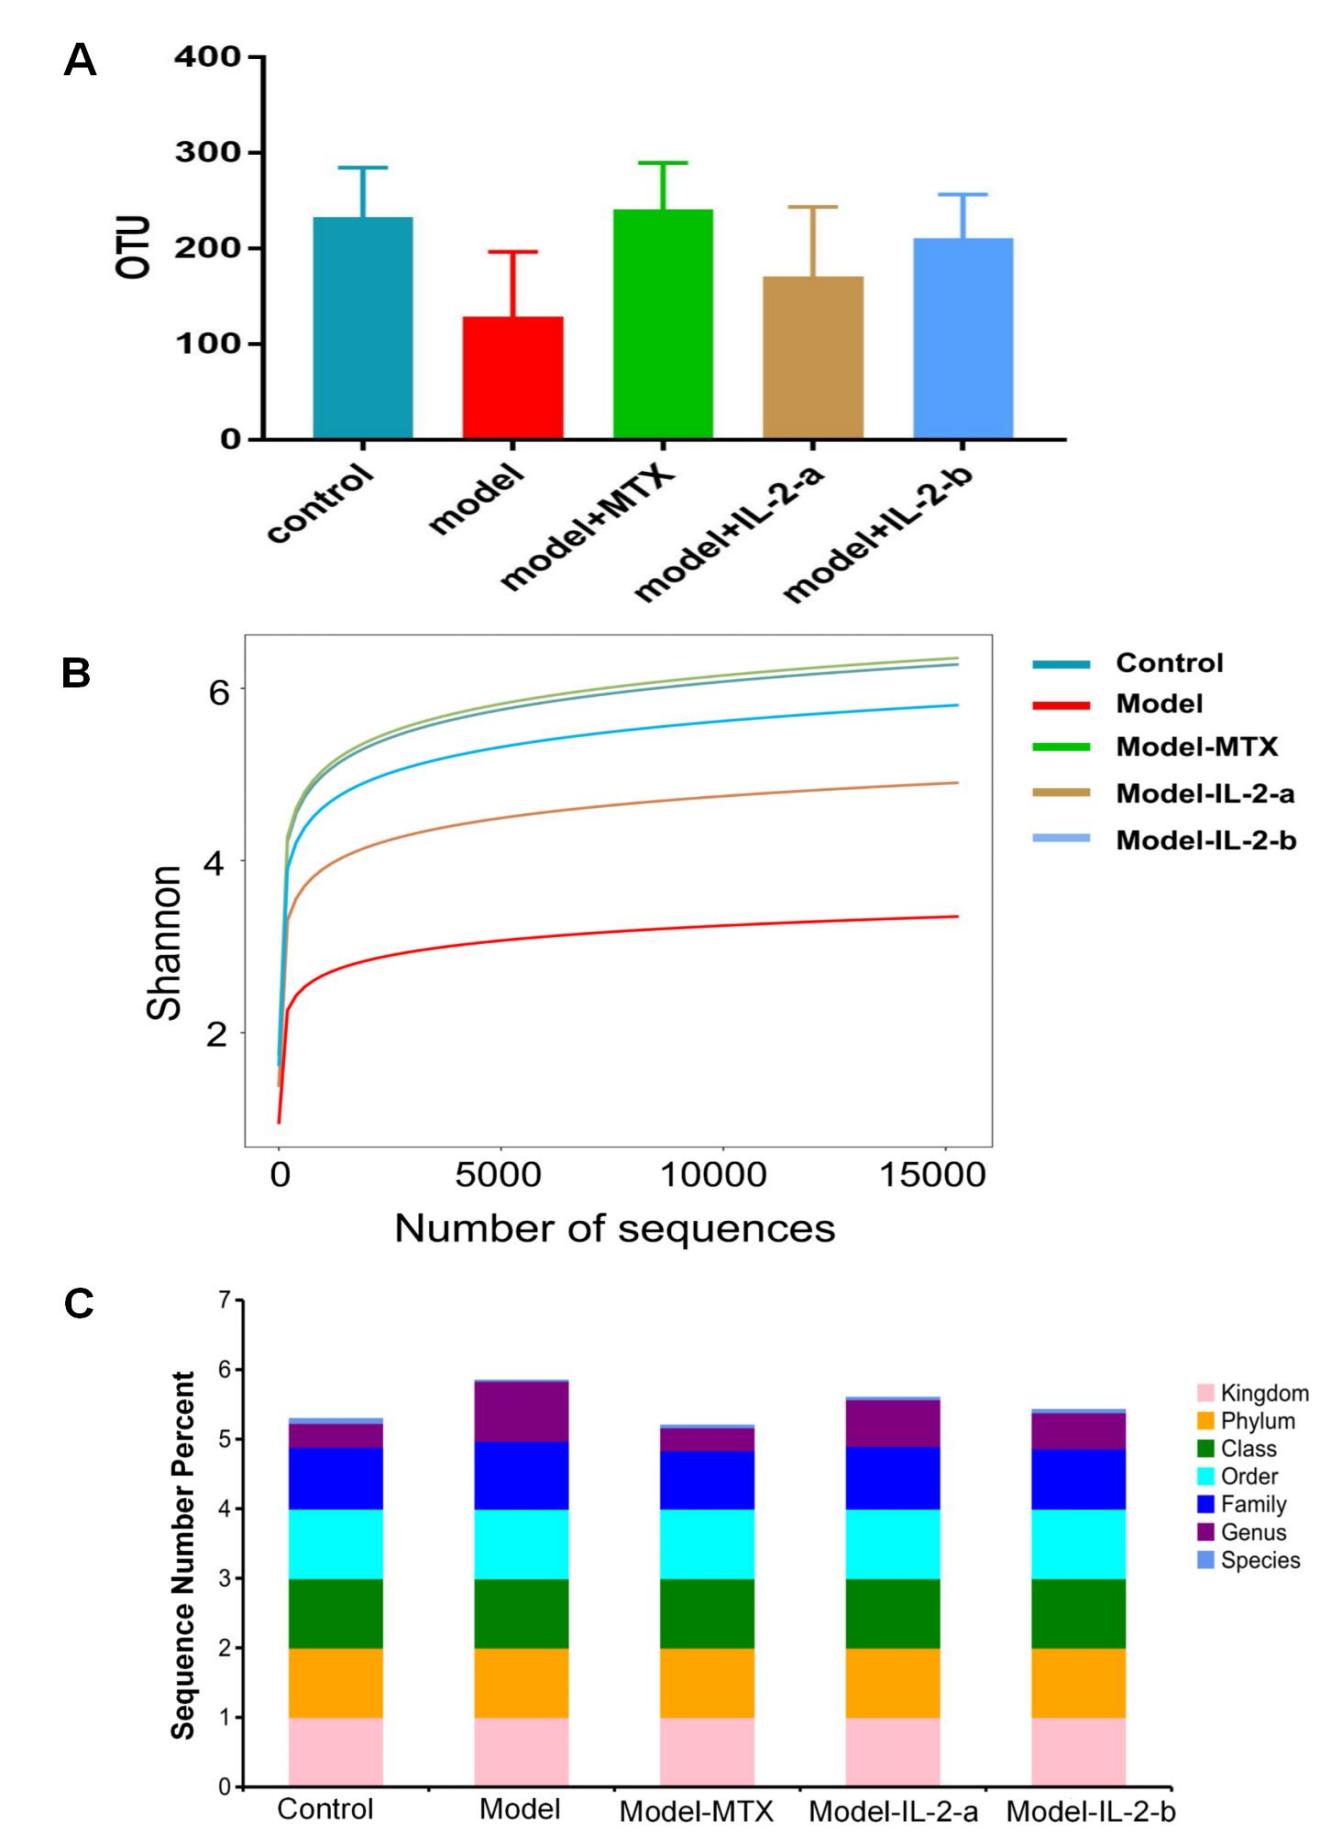
**

**Supplementary Figure 1 A-C**

**
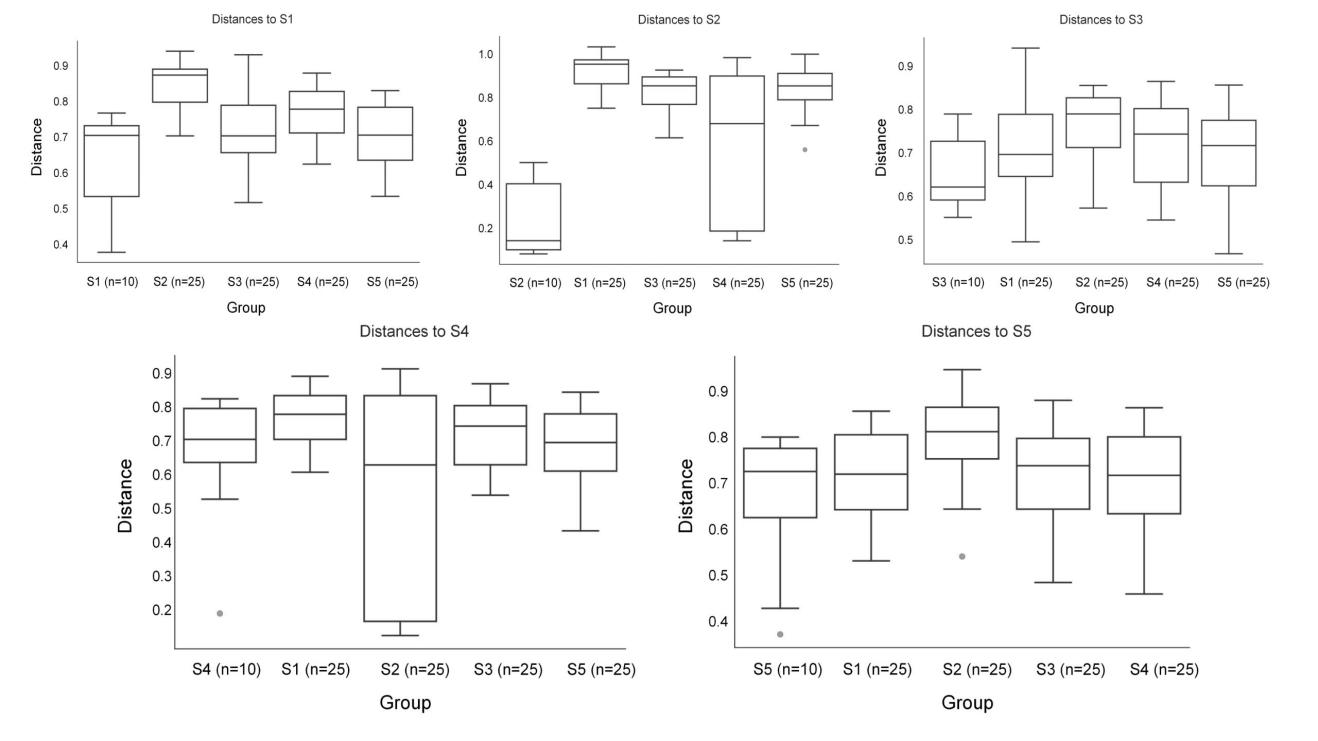
**

**Supplementary Figure 2**

**
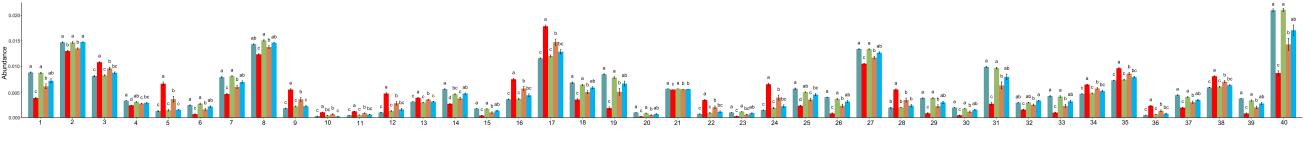
**

**Supplementary Figure 3**

**Supplementary Figure 1**

Species composition analysis

**(A)**OTUs of each group; the number of OTUs was lower in the model group than in the other groups; the numbers of OTUs were significantly higher in the IL-2-a and IL-2-b groups than in the model group.

**(B)**Shannon rarefaction curve; the amount of sequencing data was sufficient to reflect most of the microbial species in the sample.

**(C)**Observations of OTUs at each classification level in the sample.

**Supplementary Figure 2**

Permanova analysis based on Bray-Curtis distances.

S1: Control, S2: Model, S3: Model + MTX, S4: Model + IL-2-a, S5: Model + IL-2-b.

There were significant differences in microbiota composition between the model and control groups, but there were no obvious differences among the MTX, IL-2-a, IL-2-b, and control groups.

**Supplementary Figure 3**

Metabolism

In each channel, different colors are used to represent groups. Similar letters above two groups indicate a non-significant difference; different letters indicate a significant difference.
